# Supplementary material for: Synergistic Interaction in the Analgesic-Like Effects of Maqui Berry and Citrus Is Antagonized by Sweeteners
Source: MDPI journal article supplement (doi:10.3390/nu13072466), 2021-07-19
Supplement: s1 [file s1]

## Supplementary material

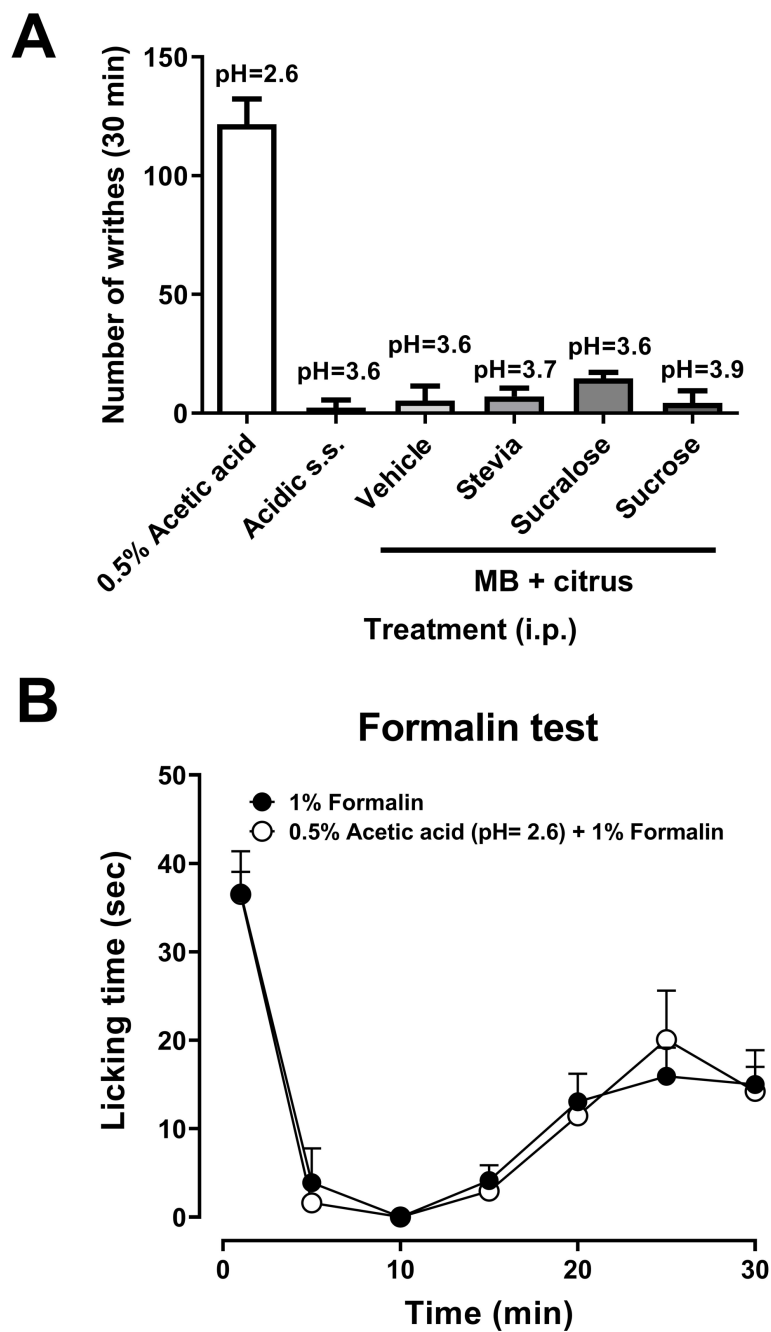

**Figure S1.** (A)  $F_{5,12} = 194.3$ ,  $p < 0.0001$  comparison of all the treatments vs 0.5% acetic acid group in writhing behavior. Acidic s.s. as a control group with similar acidic pH. S.S. Saline solution; i.p. intraperitoneal administration. (B) 0.5% acetic acid by i.p. administration was analyzed as positive control group producing nociceptive effect, which did not modify the licking time in the formalin test. [35].
